# Supplementary material for: La acreditación asegura la aceptación internacional de los productos
Source: Springer Nature journal article supplement (doi:10.1186/s12889-022-13790-w), 2004-01-01
Supplement: MOESM1 [file 23287760]

## Appendix A. Additional information: survey distribution

The survey distribution was assisted by a number of agricultural stakeholders who, at their own cost or at a subsidised commercial rate, distributed paper copies of the questionnaire along with research ethics and consent information (return of a completed questionnaire was deemed to indicate consent). The following organisations/publications distributed the questionnaire and the Tenant Farmers Association sent the questionnaire to their members:

- National Farmers Union (NFU) – British Farmer & Grower magazine
- NFU – Student Farmer magazine
- NFU *Cymru* – Farming Wales magazine
- Farmers Weekly
- Farmers Guardian x 2
- Country Land and Business Association (CLA) – Land & Business Magazine

In addition, the online version of the survey was widely promoted on Twitter via the research team, RABI and a variety of farmer and stakeholder networks. This included a communication campaign by RABI (who have almost 10,000 Twitter followers), which included photos, quotes and videos by prominent people in the farming industry and was accompanied by the hashtag #BigFarmingSurvey. Nevertheless, the high proportion of paper responses we received was not unexpected, as we know (based on previous research experience and the advice of the RABI stakeholder group) that online questionnaires can be a challenge for farmers in rural areas with poor broadband and mobile network coverage.

## Appendix B. Problems reported by dimensions (3 levels)

|                       |                 | Age   |      |       |      |       |      |       |      |       |      |       |      |      |      | All   |      |
|-----------------------|-----------------|-------|------|-------|------|-------|------|-------|------|-------|------|-------|------|------|------|-------|------|
|                       |                 | 18-24 |      | 25-34 |      | 35-44 |      | 45-54 |      | 55-64 |      | 65-74 |      | 75+  |      |       |      |
|                       |                 | n     | %    | n     | %    | n     | %    | n     | %    | n     | %    | n     | %    | n    | %    |       |      |
| Mobility              | No problems     | 330   | 95.9 | 662   | 95.1 | 959   | 92.5 | 1927  | 87   | 3471  | 80   | 2531  | 68.2 | 1143 | 53.7 | 11023 | 76.2 |
|                       | Some problems   | 14    | 4.1  | 34    | 4.9  | 77    | 7.4  | 288   | 13   | 864   | 19.9 | 1181  | 31.8 | 982  | 46.1 | 3440  | 23.8 |
|                       | Confined to bed | 0     | 0    | 0     | 0    | 1     | 0.1  | 0     | 0    | 5     | 0.1  | 1     | 0    | 3    | 0.1  | 10    | 0.1  |
| Self-care             | No problems     | 338   | 98.5 | 683   | 98.3 | 1030  | 99.3 | 2177  | 98.5 | 4233  | 97.7 | 3534  | 95.6 | 1934 | 91.2 | 13929 | 96.5 |
|                       | Some problems   | 5     | 1.5  | 12    | 1.7  | 7     | 0.7  | 32    | 1.4  | 95    | 2.2  | 153   | 4.1  | 174  | 8.2  | 478   | 3.3  |
|                       | Unable to       | 0     | 0    | 0     | 0    | 0     | 0    | 2     | 0.1  | 6     | 0.1  | 10    | 0.3  | 12   | 0.6  | 30    | 0.2  |
| Usual activities      | No problems     | 297   | 86.3 | 636   | 91.2 | 943   | 90.8 | 1912  | 86.4 | 3546  | 81.8 | 2704  | 73   | 1329 | 62.4 | 11367 | 78.6 |
|                       | Some problems   | 46    | 13.4 | 59    | 8.5  | 89    | 8.6  | 291   | 13.1 | 762   | 17.6 | 951   | 25.7 | 762  | 35.8 | 2960  | 20.5 |
|                       | Unable to       | 1     | 0.3  | 2     | 0.3  | 6     | 0.6  | 10    | 0.5  | 28    | 0.6  | 47    | 1.3  | 40   | 1.9  | 134   | 0.9  |
| Pain/<br>discomfort   | None            | 266   | 77.1 | 497   | 71.3 | 635   | 61.2 | 1131  | 51.1 | 2006  | 46.3 | 1509  | 40.8 | 822  | 38.7 | 6866  | 47.5 |
|                       | Some            | 77    | 22.3 | 195   | 28   | 388   | 37.4 | 1049  | 47.4 | 2220  | 51.3 | 2091  | 56.5 | 1246 | 58.7 | 7266  | 50.3 |
|                       | Extreme         | 2     | 0.6  | 5     | 0.7  | 15    | 1.4  | 32    | 1.4  | 102   | 2.4  | 98    | 2.7  | 54   | 2.5  | 308   | 2.1  |
| Anxious/<br>depressed | No              | 207   | 60.3 | 420   | 60.3 | 648   | 62.7 | 1386  | 63   | 2900  | 67.3 | 2693  | 73.1 | 1603 | 76.3 | 9857  | 68.6 |
|                       | Moderately      | 125   | 36.4 | 252   | 36.2 | 359   | 34.7 | 753   | 34.2 | 1323  | 30.7 | 956   | 26   | 471  | 22.4 | 4239  | 29.5 |
|                       | Extremely       | 11    | 3.2  | 25    | 3.6  | 27    | 2.6  | 60    | 2.7  | 87    | 2    | 35    | 1    | 27   | 1.3  | 272   | 1.9  |

## Appendix C. Additional information: statistical tests

Table C.1 Logistic regression analysis of reported problems with mobility

| Predictor                |                                      | B      | S.E.  | Wald     | df | p     | Odds Ratio | 95% C.I. |       |
|--------------------------|--------------------------------------|--------|-------|----------|----|-------|------------|----------|-------|
|                          |                                      |        |       |          |    |       |            | Lower    | Upper |
| Age group                | 75+                                  |        |       | 947.364  | 6  | 0.000 | 1          |          |       |
|                          | 18-24                                | -3.242 | 0.313 | 107.377  | 1  | 0.000 | 0.039      | 0.021    | 0.072 |
|                          | 25-34                                | -2.932 | 0.195 | 226.622  | 1  | 0.000 | 0.053      | 0.036    | 0.078 |
|                          | 35-44                                | -2.398 | 0.131 | 333.353  | 1  | 0.000 | 0.091      | 0.070    | 0.118 |
|                          | 45-54                                | -1.785 | 0.082 | 474.767  | 1  | 0.000 | 0.168      | 0.143    | 0.197 |
|                          | 55-64                                | -1.279 | 0.063 | 418.529  | 1  | 0.000 | 0.278      | 0.246    | 0.314 |
|                          | 65-74                                | -0.633 | 0.060 | 113.089  | 1  | 0.000 | 0.531      | 0.473    | 0.597 |
| Gender                   | Female                               |        |       |          |    |       | 1          |          |       |
|                          | Male                                 | 0.117  | 0.056 | 4.413    | 1  | 0.036 | 1.124      | 1.008    | 1.254 |
| Farm type                | Cereals                              |        |       | 98.143   | 9  | 0.000 | 1          |          |       |
|                          | General cropping                     | 0.023  | 0.109 | 0.046    | 1  | 0.830 | 1.024      | 0.827    | 1.268 |
|                          | Horticulture                         | 0.020  | 0.167 | 0.015    | 1  | 0.903 | 1.021      | 0.735    | 1.416 |
|                          | Specialist Pigs                      | 1.062  | 0.267 | 15.763   | 1  | 0.000 | 2.891      | 1.712    | 4.882 |
|                          | Specialist Poultry                   | 0.155  | 0.240 | 0.418    | 1  | 0.518 | 1.168      | 0.729    | 1.871 |
|                          | Dairy                                | 0.614  | 0.094 | 42.641   | 1  | 0.000 | 1.847      | 1.536    | 2.220 |
|                          | LFA Grazing Livestock                | 0.645  | 0.087 | 55.076   | 1  | 0.000 | 1.906      | 1.608    | 2.260 |
|                          | Lowland Grazing Livestock            | 0.418  | 0.088 | 22.836   | 1  | 0.000 | 1.519      | 1.280    | 1.804 |
|                          | Mixed                                | 0.405  | 0.078 | 27.243   | 1  | 0.000 | 1.499      | 1.288    | 1.746 |
|                          | Other                                | 0.533  | 0.136 | 15.431   | 1  | 0.000 | 1.703      | 1.306    | 2.222 |
| Farm size                | 500+ ha                              |        |       | 20.632   | 5  | 0.001 | 1          |          |       |
|                          | <20 ha                               | 0.238  | 0.117 | 4.146    | 1  | 0.042 | 1.269      | 1.009    | 1.595 |
|                          | 20-49ha                              | 0.292  | 0.099 | 8.638    | 1  | 0.003 | 1.339      | 1.102    | 1.627 |
|                          | 50-99ha                              | 0.248  | 0.094 | 7.018    | 1  | 0.008 | 1.282      | 1.067    | 1.541 |
|                          | 100-199ha                            | 0.105  | 0.090 | 1.360    | 1  | 0.244 | 1.111      | 0.931    | 1.326 |
|                          | 200-499ha                            | 0.011  | 0.091 | 0.014    | 1  | 0.907 | 1.011      | 0.845    | 1.209 |
| Farm tenure              | Wholly/mostly owned                  |        |       | 14.805   | 3  | 0.002 | 1          |          |       |
|                          | Wholly/mostly rented                 | 0.189  | 0.058 | 10.831   | 1  | 0.001 | 1.208      | 1.080    | 1.353 |
|                          | Mixed tenure                         | 0.122  | 0.068 | 3.200    | 1  | 0.074 | 1.129      | 0.988    | 1.291 |
|                          | N/A                                  | 0.624  | 0.356 | 3.072    | 1  | 0.080 | 1.866      | 0.929    | 3.747 |
| Respondent role          | Retired/semi-retired                 |        |       | 2.075    | 7  | 0.956 |            |          |       |
|                          | Sole/primary farmer                  | -0.059 | 0.163 | 0.130    | 1  | 0.719 | 0.943      | 0.684    | 1.299 |
|                          | Farming member of farm household     | -0.062 | 0.165 | 0.142    | 1  | 0.706 | 0.940      | 0.680    | 1.299 |
|                          | Non-farming member of farm household | -0.096 | 0.188 | 0.264    | 1  | 0.607 | 0.908      | 0.629    | 1.311 |
|                          | Farm employee (director/manager)     | -0.125 | 0.191 | 0.428    | 1  | 0.513 | 0.883      | 0.608    | 1.282 |
|                          | Farm employee (any other worker)     | -0.184 | 0.286 | 0.413    | 1  | 0.520 | 0.832      | 0.476    | 1.457 |
|                          | Farm contractor                      | -0.103 | 0.305 | 0.113    | 1  | 0.736 | 0.903      | 0.497    | 1.640 |
|                          | Other                                | 0.077  | 0.206 | 0.139    | 1  | 0.709 | 1.080      | 0.721    | 1.617 |
| Overall model evaluation |                                      |        |       | $\chi^2$ | df | p     |            |          |       |
|                          |                                      |        |       | 1411.008 | 31 | 0.000 |            |          |       |

**Table C.2 Logistic regression analysis of reported problems with self-care**

| Predictor                |                                      | B      | S.E.  | Wald     | df | p     | Odds Ratio | 95% C.I. |        |
|--------------------------|--------------------------------------|--------|-------|----------|----|-------|------------|----------|--------|
|                          |                                      |        |       |          |    |       |            | Lower    | Upper  |
| Age group                | 75+                                  |        |       | 173.714  | 6  | 0.000 | 1          |          |        |
|                          | 18-24                                | -1.892 | 0.470 | 16.175   | 1  | 0.000 | 0.151      | 0.060    | 0.379  |
|                          | 25-34                                | -1.908 | 0.352 | 29.366   | 1  | 0.000 | 0.148      | 0.074    | 0.296  |
|                          | 35-44                                | -2.694 | 0.420 | 41.068   | 1  | 0.000 | 0.068      | 0.030    | 0.154  |
|                          | 45-54                                | -1.775 | 0.201 | 78.186   | 1  | 0.000 | 0.169      | 0.114    | 0.251  |
|                          | 55-64                                | -1.367 | 0.137 | 100.125  | 1  | 0.000 | 0.255      | 0.195    | 0.333  |
|                          | 65-74                                | -0.722 | 0.118 | 37.375   | 1  | 0.000 | 0.486      | 0.385    | 0.612  |
| Gender                   | Female                               |        |       |          |    |       | 1          |          |        |
|                          | Male                                 | 0.255  | 0.131 | 3.780    | 1  | 0.052 | 1.290      | 0.998    | 1.668  |
| Farm type                | Cereals                              |        |       | 14.443   | 9  | 0.107 |            |          |        |
|                          | General cropping                     | 0.178  | 0.248 | 0.514    | 1  | 0.473 | 1.194      | 0.735    | 1.941  |
|                          | Horticulture                         | -0.032 | 0.377 | 0.007    | 1  | 0.933 | 0.969      | 0.463    | 2.028  |
|                          | Specialist Pigs                      | 0.636  | 0.554 | 1.317    | 1  | 0.251 | 1.890      | 0.637    | 5.602  |
|                          | Specialist Poultry                   | -1.458 | 1.025 | 2.025    | 1  | 0.155 | 0.233      | 0.031    | 1.734  |
|                          | Dairy                                | 0.542  | 0.216 | 6.288    | 1  | 0.012 | 1.719      | 1.126    | 2.625  |
|                          | LFA Grazing Livestock                | 0.502  | 0.200 | 6.285    | 1  | 0.012 | 1.652      | 1.116    | 2.446  |
|                          | Lowland Grazing Livestock            | 0.362  | 0.199 | 3.323    | 1  | 0.068 | 1.437      | 0.973    | 2.122  |
|                          | Mixed                                | 0.271  | 0.184 | 2.179    | 1  | 0.140 | 1.311      | 0.915    | 1.879  |
|                          | Other                                | 0.153  | 0.309 | 0.247    | 1  | 0.619 | 1.166      | 0.637    | 2.135  |
| Farm size                | 500+ ha                              |        |       | 12.994   | 5  | 0.023 | 1          |          |        |
|                          | <20 ha                               | 0.754  | 0.265 | 8.082    | 1  | 0.004 | 2.127      | 1.264    | 3.577  |
|                          | 20-49ha                              | 0.473  | 0.241 | 3.858    | 1  | 0.050 | 1.604      | 1.001    | 2.571  |
|                          | 50-99ha                              | 0.403  | 0.232 | 3.019    | 1  | 0.082 | 1.496      | 0.950    | 2.356  |
|                          | 100-199ha                            | 0.388  | 0.224 | 2.995    | 1  | 0.084 | 1.474      | 0.950    | 2.288  |
|                          | 200-499ha                            | 0.086  | 0.233 | 0.137    | 1  | 0.711 | 1.090      | 0.691    | 1.720  |
| Farm tenure              | Wholly/mostly owned                  |        |       | 9.745    | 3  | 0.021 | 1          |          |        |
|                          | Wholly/mostly rented                 | 0.222  | 0.130 | 2.911    | 1  | 0.088 | 1.249      | 0.967    | 1.612  |
|                          | Mixed tenure                         | 0.088  | 0.159 | 0.304    | 1  | 0.581 | 1.092      | 0.800    | 1.490  |
|                          | N/A                                  | 1.369  | 0.510 | 7.206    | 1  | 0.007 | 3.931      | 1.447    | 10.680 |
| Respondent role          | Retired/semi-retired                 |        |       | 7.181    | 7  | 0.410 | 1          |          |        |
|                          | Sole/primary farmer                  | -0.096 | 0.304 | 0.100    | 1  | 0.751 | 0.908      | 0.500    | 1.648  |
|                          | Farming member of farm household     | -0.080 | 0.310 | 0.066    | 1  | 0.797 | 0.923      | 0.503    | 1.694  |
|                          | Non-farming member of farm household | 0.120  | 0.353 | 0.114    | 1  | 0.735 | 1.127      | 0.564    | 2.253  |
|                          | Farm employee (director/manager)     | -0.175 | 0.395 | 0.196    | 1  | 0.658 | 0.840      | 0.387    | 1.820  |
|                          | Farm employee (any other worker)     | 0.607  | 0.499 | 1.476    | 1  | 0.224 | 1.834      | 0.689    | 4.881  |
|                          | Farm contractor                      | -0.665 | 0.785 | 0.717    | 1  | 0.397 | 0.514      | 0.110    | 2.396  |
|                          | Other                                | 0.322  | 0.385 | 0.699    | 1  | 0.403 | 1.380      | 0.649    | 2.936  |
| Overall model evaluation |                                      |        |       | $\chi^2$ | df | p     |            |          |        |
|                          |                                      |        |       | 268.298  | 31 | <.001 |            |          |        |

**Table C.3 Logistic regression analysis of reported problems with performing usual activities**

| Predictor                |                                      | B      | S.E.   | Wald     | df    | p     | Odds Ratio | 95% C.I. |       |
|--------------------------|--------------------------------------|--------|--------|----------|-------|-------|------------|----------|-------|
|                          |                                      |        |        |          |       |       |            | Lower    | Upper |
| Age group                | 75+                                  |        |        | 549.635  | 6     | 0.000 | 1          |          |       |
|                          | 18-24                                | -1.455 | 0.179  | 66.298   | 1     | 0.000 | 0.233      | 0.164    | 0.331 |
|                          | 25-34                                | -1.921 | 0.153  | 158.572  | 1     | 0.000 | 0.146      | 0.109    | 0.197 |
|                          | 35-44                                | -1.809 | 0.122  | 218.413  | 1     | 0.000 | 0.164      | 0.129    | 0.208 |
|                          | 45-54                                | -1.378 | 0.082  | 282.993  | 1     | 0.000 | 0.252      | 0.215    | 0.296 |
|                          | 55-64                                | -1.036 | 0.064  | 258.738  | 1     | 0.000 | 0.355      | 0.313    | 0.403 |
|                          | 65-74                                | -0.515 | 0.062  | 69.972   | 1     | 0.000 | 0.597      | 0.529    | 0.674 |
| Gender                   | Female                               |        |        |          |       |       | 1          |          |       |
|                          | Male                                 | 0.129  | 0.056  | 5.218    | 1     | 0.022 | 1.137      | 1.018    | 1.270 |
| Farm type                | Cereals                              |        |        | 64.801   | 9     | 0.000 | 1          |          |       |
|                          | General cropping                     | 0.084  | 0.110  | 0.576    | 1     | 0.448 | 1.087      | 0.876    | 1.350 |
|                          | Horticulture                         | 0.298  | 0.162  | 3.383    | 1     | 0.066 | 1.347      | 0.981    | 1.851 |
|                          | Specialist Pigs                      | 0.911  | 0.270  | 11.391   | 1     | 0.001 | 2.488      | 1.465    | 4.223 |
|                          | Specialist Poultry                   | 0.181  | 0.246  | 0.540    | 1     | 0.462 | 1.198      | 0.740    | 1.940 |
|                          | Dairy                                | 0.383  | 0.096  | 15.787   | 1     | 0.000 | 1.466      | 1.214    | 1.770 |
|                          | LFA Grazing                          | 0.615  | 0.088  | 49.060   | 1     | 0.000 | 1.851      | 1.558    | 2.198 |
|                          | Livestock                            |        |        |          |       |       |            |          |       |
|                          | Lowland Grazing                      | 0.361  | 0.089  | 16.448   | 1     | 0.000 | 1.435      | 1.205    | 1.708 |
|                          | Livestock                            |        |        |          |       |       |            |          |       |
|                          | Mixed                                | 0.297  | 0.079  | 14.059   | 1     | 0.000 | 1.346      | 1.152    | 1.572 |
| Other                    | 0.480                                | 0.139  | 11.884 | 1        | 0.001 | 1.616 | 1.230      | 2.123    |       |
| Farm size                | 500+ ha                              |        |        | 23.767   | 5     | 0.000 | 1          |          |       |
|                          | <20 ha                               | 0.243  | 0.121  | 3.993    | 1     | 0.046 | 1.275      | 1.005    | 1.617 |
|                          | 20-49ha                              | 0.394  | 0.103  | 14.622   | 1     | 0.000 | 1.484      | 1.212    | 1.816 |
|                          | 50-99ha                              | 0.409  | 0.097  | 17.635   | 1     | 0.000 | 1.505      | 1.244    | 1.822 |
|                          | 100-199ha                            | 0.302  | 0.094  | 10.340   | 1     | 0.001 | 1.352      | 1.125    | 1.625 |
|                          | 200-499ha                            | 0.196  | 0.095  | 4.289    | 1     | 0.038 | 1.217      | 1.011    | 1.465 |
| Farm tenure              | Wholly/mostly owned                  |        |        | 17.337   | 3     | 0.001 | 1          |          |       |
|                          | Wholly/mostly rented                 | 0.181  | 0.058  | 9.735    | 1     | 0.002 | 1.199      | 1.070    | 1.344 |
|                          | Mixed tenure                         | 0.184  | 0.068  | 7.214    | 1     | 0.007 | 1.202      | 1.051    | 1.374 |
|                          | N/A                                  | 0.679  | 0.348  | 3.805    | 1     | 0.051 | 1.972      | 0.997    | 3.900 |
| Respondent role          | Retired/semi-retired                 |        |        | 5.742    | 7     | 0.570 | 1          |          |       |
|                          | Sole/primary farmer                  | -0.088 | 0.167  | 0.276    | 1     | 0.600 | 0.916      | 0.661    | 1.271 |
|                          | Farming member of farm household     | -0.109 | 0.169  | 0.419    | 1     | 0.518 | 0.897      | 0.644    | 1.248 |
|                          | Non-farming member of farm household | -0.220 | 0.193  | 1.300    | 1     | 0.254 | 0.803      | 0.550    | 1.171 |
|                          | Farm employee (director/manager)     | -0.239 | 0.195  | 1.501    | 1     | 0.220 | 0.787      | 0.537    | 1.154 |
|                          | Farm employee (any other worker)     | 0.158  | 0.257  | 0.378    | 1     | 0.539 | 1.171      | 0.708    | 1.939 |
|                          | Farm contractor                      | -0.250 | 0.314  | 0.633    | 1     | 0.426 | 0.779      | 0.421    | 1.440 |
|                          | Other                                | -0.112 | 0.212  | 0.279    | 1     | 0.597 | 0.894      | 0.590    | 1.355 |
| Overall model evaluation |                                      |        |        | $\chi^2$ | df    | p     |            |          |       |
|                          |                                      |        |        | 786.234  | 31    | <.001 |            |          |       |

**Table C.4 Logistic regression analysis of reported problems with pain or discomfort**

| Predictor                |                                      | B      | S.E.   | Wald     | df    | p     | Odds Ratio | 95% C.I. |       |
|--------------------------|--------------------------------------|--------|--------|----------|-------|-------|------------|----------|-------|
|                          |                                      |        |        |          |       |       |            | Lower    | Upper |
| Age group                | 75+                                  |        |        | 404.362  | 6     | 0.000 | 1          |          |       |
|                          | 18-24                                | -1.687 | 0.145  | 135.764  | 1     | 0.000 | 0.185      | 0.139    | 0.246 |
|                          | 25-34                                | -1.393 | 0.102  | 188.005  | 1     | 0.000 | 0.248      | 0.204    | 0.303 |
|                          | 35-44                                | -0.927 | 0.083  | 125.476  | 1     | 0.000 | 0.396      | 0.337    | 0.466 |
|                          | 45-54                                | -0.528 | 0.066  | 63.292   | 1     | 0.000 | 0.590      | 0.518    | 0.672 |
|                          | 55-64                                | -0.329 | 0.058  | 31.899   | 1     | 0.000 | 0.720      | 0.642    | 0.807 |
|                          | 65-74                                | -0.099 | 0.059  | 2.792    | 1     | 0.095 | 0.906      | 0.807    | 1.017 |
| Gender                   | Female                               |        |        |          |       |       | 1          |          |       |
|                          | Male                                 | 0.202  | 0.044  | 20.549   | 1     | 0.000 | 1.223      | 1.121    | 1.335 |
| Farm type                | Cereals                              |        |        | 104.309  | 9     | 0.000 |            |          |       |
|                          | General cropping                     | 0.021  | 0.084  | 0.061    | 1     | 0.804 | 1.021      | 0.865    | 1.205 |
|                          | Horticulture                         | -0.025 | 0.127  | 0.039    | 1     | 0.843 | 0.975      | 0.760    | 1.251 |
|                          | Specialist Pigs                      | 0.630  | 0.244  | 6.666    | 1     | 0.010 | 1.878      | 1.164    | 3.030 |
|                          | Specialist Poultry                   | 0.079  | 0.187  | 0.179    | 1     | 0.672 | 1.083      | 0.750    | 1.563 |
|                          | Dairy                                | 0.529  | 0.075  | 50.179   | 1     | 0.000 | 1.697      | 1.466    | 1.964 |
|                          | LFA Grazing                          | 0.511  | 0.070  | 53.105   | 1     | 0.000 | 1.667      | 1.453    | 1.912 |
|                          | Livestock                            |        |        |          |       |       |            |          |       |
|                          | Lowland Grazing                      | 0.379  | 0.070  | 28.966   | 1     | 0.000 | 1.460      | 1.272    | 1.677 |
|                          | Livestock                            |        |        |          |       |       |            |          |       |
|                          | Mixed                                | 0.367  | 0.060  | 37.205   | 1     | 0.000 | 1.444      | 1.283    | 1.625 |
| Other                    | 0.469                                | 0.118  | 15.930 | 1        | 0.000 | 1.599 | 1.270      | 2.013    |       |
| Farm size                | 500+ ha                              |        |        | 27.150   | 5     | 0.000 | 1          |          |       |
|                          | <20 ha                               | 0.375  | 0.095  | 15.391   | 1     | 0.000 | 1.455      | 1.206    | 1.754 |
|                          | 20-49ha                              | 0.398  | 0.080  | 24.759   | 1     | 0.000 | 1.488      | 1.273    | 1.741 |
|                          | 50-99ha                              | 0.260  | 0.074  | 12.368   | 1     | 0.000 | 1.297      | 1.122    | 1.500 |
|                          | 100-199ha                            | 0.283  | 0.070  | 16.440   | 1     | 0.000 | 1.327      | 1.157    | 1.521 |
|                          | 200-499ha                            | 0.232  | 0.070  | 11.182   | 1     | 0.001 | 1.262      | 1.101    | 1.446 |
| Farm tenure              | Wholly/mostly owned                  |        |        | 21.053   | 3     | 0.000 | 1          |          |       |
|                          | Wholly/mostly rented                 | 0.157  | 0.047  | 10.957   | 1     | 0.001 | 1.170      | 1.066    | 1.284 |
|                          | Mixed tenure                         | 0.175  | 0.055  | 10.083   | 1     | 0.001 | 1.191      | 1.069    | 1.327 |
|                          | N/A                                  | 0.652  | 0.319  | 4.175    | 1     | 0.041 | 1.920      | 1.027    | 3.588 |
| Respondent role          | Retired/semi-retired                 |        |        | 18.272   | 7     | 0.011 | 1          |          |       |
|                          | Sole/primary farmer                  | 0.101  | 0.161  | 0.398    | 1     | 0.528 | 1.107      | 0.808    | 1.516 |
|                          | Farming member of farm household     | 0.019  | 0.162  | 0.013    | 1     | 0.908 | 1.019      | 0.742    | 1.399 |
|                          | Non-farming member of farm household | -0.230 | 0.178  | 1.667    | 1     | 0.197 | 0.794      | 0.560    | 1.127 |
|                          | Farm employee (director/manager)     | -0.072 | 0.176  | 0.169    | 1     | 0.681 | 0.930      | 0.658    | 1.314 |
|                          | Farm employee (any other worker)     | 0.047  | 0.222  | 0.045    | 1     | 0.832 | 1.048      | 0.678    | 1.620 |
|                          | Farm contractor                      | 0.028  | 0.258  | 0.012    | 1     | 0.914 | 1.028      | 0.620    | 1.704 |
|                          | Other                                | 0.019  | 0.192  | 0.010    | 1     | 0.922 | 1.019      | 0.699    | 1.486 |
| Overall model evaluation |                                      |        |        | $\chi^2$ | df    | p     |            |          |       |
|                          |                                      |        |        | 721.563  | 31    | <.001 |            |          |       |

**Table C.5 Logistic regression analysis of reported problems with anxiety or depression**

| Predictor                |                                      | B      | S.E.  | Wald     | df | p     | Odds Ratio | 95% C.I. |       |
|--------------------------|--------------------------------------|--------|-------|----------|----|-------|------------|----------|-------|
|                          |                                      |        |       |          |    |       |            | Lower    | Upper |
| Age group                | 75+                                  |        |       | 118.987  | 6  | 0.000 | 1          |          |       |
|                          | 18-24                                | 0.646  | 0.131 | 24.466   | 1  | 0.000 | 1.907      | 1.477    | 2.463 |
|                          | 25-34                                | 0.677  | 0.100 | 45.957   | 1  | 0.000 | 1.969      | 1.619    | 2.395 |
|                          | 35-44                                | 0.632  | 0.088 | 51.920   | 1  | 0.000 | 1.882      | 1.584    | 2.235 |
|                          | 45-54                                | 0.588  | 0.073 | 64.823   | 1  | 0.000 | 1.800      | 1.560    | 2.076 |
|                          | 55-64                                | 0.424  | 0.065 | 42.040   | 1  | 0.000 | 1.528      | 1.344    | 1.737 |
|                          | 65-74                                | 0.180  | 0.067 | 7.172    | 1  | 0.007 | 1.197      | 1.049    | 1.365 |
| Gender                   | Female                               |        |       |          |    |       | 1          |          |       |
|                          | Male                                 | -0.359 | 0.046 | 61.481   | 1  | 0.000 | 0.698      | 0.638    | 0.764 |
| Farm type                | Cereals                              |        |       | 18.563   | 9  | 0.029 | 1          |          |       |
|                          | General cropping                     | 0.127  | 0.094 | 1.848    | 1  | 0.174 | 1.136      | 0.945    | 1.364 |
|                          | Horticulture                         | 0.027  | 0.138 | 0.038    | 1  | 0.845 | 1.027      | 0.784    | 1.347 |
|                          | Specialist Pigs                      | 0.779  | 0.242 | 10.389   | 1  | 0.001 | 2.179      | 1.357    | 3.498 |
|                          | Specialist Poultry                   | 0.139  | 0.198 | 0.498    | 1  | 0.480 | 1.150      | 0.780    | 1.693 |
|                          | Dairy                                | 0.163  | 0.080 | 4.133    | 1  | 0.042 | 1.177      | 1.006    | 1.378 |
|                          | LFA Grazing Livestock                | 0.133  | 0.076 | 3.043    | 1  | 0.081 | 1.142      | 0.984    | 1.326 |
|                          | Lowland Grazing Livestock            | 0.133  | 0.077 | 3.021    | 1  | 0.082 | 1.142      | 0.983    | 1.328 |
|                          | Mixed                                | 0.203  | 0.066 | 9.335    | 1  | 0.002 | 1.225      | 1.075    | 1.395 |
|                          | Other                                | 0.069  | 0.127 | 0.297    | 1  | 0.586 | 1.072      | 0.836    | 1.374 |
| Farm size                | 500+ ha                              |        |       | 20.320   | 5  | 0.001 | 1          |          |       |
|                          | <20 ha                               | 0.301  | 0.102 | 8.678    | 1  | 0.003 | 1.352      | 1.106    | 1.652 |
|                          | 20-49ha                              | 0.345  | 0.086 | 15.922   | 1  | 0.000 | 1.412      | 1.192    | 1.672 |
|                          | 50-99ha                              | 0.298  | 0.081 | 13.659   | 1  | 0.000 | 1.347      | 1.150    | 1.577 |
|                          | 100-199ha                            | 0.273  | 0.076 | 12.913   | 1  | 0.000 | 1.314      | 1.132    | 1.526 |
|                          | 200-499ha                            | 0.171  | 0.076 | 5.029    | 1  | 0.025 | 1.186      | 1.022    | 1.377 |
| Farm tenure              | Wholly/mostly owned                  |        |       | 17.930   | 3  | 0.000 | 1          |          |       |
|                          | Wholly/mostly rented                 | 0.191  | 0.049 | 15.183   | 1  | 0.000 | 1.211      | 1.100    | 1.333 |
|                          | Mixed tenure                         | 0.104  | 0.058 | 3.160    | 1  | 0.075 | 1.109      | 0.989    | 1.243 |
|                          | N/A                                  | 0.477  | 0.321 | 2.211    | 1  | 0.137 | 1.611      | 0.859    | 3.022 |
| Respondent role          | Retired/semi-retired                 |        |       | 17.288   | 7  | 0.016 | 1          |          |       |
|                          | Sole/primary farmer                  | 0.059  | 0.182 | 0.106    | 1  | 0.745 | 1.061      | 0.742    | 1.516 |
|                          | Farming member of farm household     | -0.031 | 0.183 | 0.029    | 1  | 0.865 | 0.969      | 0.677    | 1.389 |
|                          | Non-farming member of farm household | -0.192 | 0.201 | 0.913    | 1  | 0.339 | 0.825      | 0.556    | 1.224 |
|                          | Farm employee (director/manager)     | -0.204 | 0.199 | 1.052    | 1  | 0.305 | 0.815      | 0.552    | 1.205 |
|                          | Farm employee (any other worker)     | 0.057  | 0.238 | 0.057    | 1  | 0.812 | 1.058      | 0.664    | 1.688 |
|                          | Farm contractor                      | -0.038 | 0.280 | 0.018    | 1  | 0.892 | 0.963      | 0.556    | 1.666 |
|                          | Other                                | 0.150  | 0.212 | 0.500    | 1  | 0.479 | 1.162      | 0.766    | 1.762 |
| Overall model evaluation |                                      |        |       | $\chi^2$ | df | p     |            |          |       |
|                          |                                      |        |       | 309.918  | 31 | <.001 |            |          |       |

**Table C.6 Sub-group n values for mean EQ-5D index values by age for a) females and b) males**

| <b>Age group (years)</b> | <b>Females</b> | <b>Males</b> |
|--------------------------|----------------|--------------|
| 18-24                    | 180            | 159          |
| 25-34                    | 267            | 421          |
| 35-44                    | 288            | 733          |
| 45-54                    | 575            | 1581         |
| 55-64                    | 997            | 3229         |
| 65-74                    | 638            | 2935         |
| 75+                      | 321            | 1684         |
| All ages                 | 3266           | 10742        |

**Table C.7 Sub-group n values for EQ-VAS by age for a) females and b) males**

| <b>Age group (years)</b> | <b>Females</b> | <b>Males</b> |
|--------------------------|----------------|--------------|
| 18-24                    | 181            | 162          |
| 25-34                    | 268            | 424          |
| 35-44                    | 290            | 740          |
| 45-54                    | 582            | 1597         |
| 55-64                    | 1000           | 3254         |
| 65-74                    | 646            | 2961         |
| 75+                      | 327            | 1718         |
| All ages                 | 3294           | 10856        |
